# Supplementary material for: Quantification of 108 illicit drugs and metabolites in bile matrix by LC–MS/MS for the toxicological testing of sudden death cases
Source: Arch Toxicol. 2023 Dec 5;98(1):135–49. doi: 10.1007/s00204-023-03631-z (PMC10761401; doi:10.1007/s00204-023-03631-z)
Supplement: Supplementary file 1 — Supplementary file1 (XLSX 2997 kb) [file 204_2023_3631_MOESM1_ESM.xlsx]

## Sheet: Analytes
Analytes divided in classes
Amphetamines	Benzodiazepines	Booster	Cocaine	Cannabinoids	Opiates/opioids	Z-drugs	Others	Barbiturates
Amphetamine	Alprazolam	Gabapentin	Benzoylecgonine	11-nor-9-Carboxy-Δ9-THC	Acetylcodeine	Zaleplon	Ketamine	Allobarbital
3,4-methylenedioxyphenyl-2-butanamine (BDB)	7-aminoclonazepam	Pregabalin	Cocaethylene		Buprenorphine	Zolpidem	Lysergic acid diethylamide (LSD)	Amobarbital
Butylone	7-aminoflunitrazepam	Promethazine	Cocaine		Codeine	Zopiclone	Mescaline	Barbital
4-bromo-2,5-dimethoxyphenethylamine (2C-B)	7-aminonitrazepam	Quetiapine	Norcocaine		Dihydrocodeine		Norketamine	Butalbital
4-iodo-2,5-dimethoxyphenethylamine (2C-I)	Bromazepam				2-ethylidene-1,5-dimethyl-3,3-diphenylpyrrolidine (EDDP)		2-Oxo-3-hydroxy-LSD	Hexobarbital
Cathinone	Brotizolam				Fentanyl		Phencyclidine (PCP)	Pentobarbital
3,4-methylbenzodioxolylbutanamine (MBDB)	Chlordiazepoxide				Hydrocodone			Phenobarbital
3,4-methylenedioxyamphetamine (MDA)	Clobazam				Hydromorphone			Secbutabarbital
3,4-methylenedioxy-N-ethylamphetamine (MDEA)	Clonazepam				Meconin			Secobarbital
3,4-metilenediossimetanfetamina (MDMA)	Demoxepam				Meperidine			Thiopental
3,4-methylenedioxypyrovalerone (MDPV)	Desalkylflurazepam				Methadone
Mephedrone	Desmethylflunitrazepam				6-Monoacetylmorphine (6-MAM)
Methamphetamine	Diazepam				Morphine
Methaqualone	Estazolam				Naloxone
Methylone	Flunitrazepam				Naltrexone
Methylphenidate	Flurazepam				Norbuprenorphine
para-methoxyamphetamine (PMA)	α-hydroxyalprazolam				Norcodeine
Ritalinic acid	α-hydroxymidazolam				Norfentanyl
	α-hydroxytriazolam				Normeperidine
	3-hydroxybromazepam				Nortapentadol
	Lorazepam				Nortilidine
	Lormetazepam				O-Desmethyltramadol
	Medazepam				Oxycodone
	Midazolam				Oxymorphone
	Nitrazepam				Papaverine
	Norclobazam				Propoxyphene
	Nordiazepam				Sufentanil
	Oxazepam				Tapentadol
	Prazepam				Thebaine
	Temazepam				Tilidine
	Triazolam				Tramadol

## Sheet: Internal standards
Internal standards
Amphetamine-D5
BDB-D2
Butylone-D2
2C-B-D5
2C-I-D5
Cathinone-D5
MBDB-D4
MDA-D4
MDEA-D4
MDMA-D2
MDPV-D7
Mephedrone-D3
Methamphetamine-D4
Methaqualone-D6
Methylone-D2
Methylphenidate-D10
Ritalinic-acid-D4
Alprazolam-D6
7-NH2-Clonazepam-D4
7-NH2-Flunitrazepam-D3
7-NH2-Nitrazepam-D5
Bromazepam-D4
Chlordiazepoxide-D5
Clobazam-D8
Clonazepam-D4
Demoxepam-D5
DA-Flurazepam-D4
DM-Flunitrazepam-D4
Diazepam-D4
Estazolam-D4
Flunitrazepam-D3
Flurazepam-D10
OH-Alprazolam-D5
OH-Midazolam-D4
OH-Triazolam-D6
OH-Bromazepam-D4
Lorazepam-D4
Lormetazepam-D8
Medazepam-D4
Midazolam-D6
Nitrazepam-D5
Norclobazam-D6
Nordiazepam-D5
Oxazepam-D5
Prazepam-D4
Temazepam-D6
Triazolam-D6
Gabapentin-D4
Pregebalin-D4
Promethazine-D5
Quetiapine-D3
Benzoylecgonine-D3
Cocaethylene-D2
Cocaine-D2
Norcocaine-D2
THC-COOH-D3
Acetylcodeine-D3
Buprenorphine-D4
Codeine-D6
Dihydrocodeine-D6
EDDP-D3
Fentanyl-D5
Hydrocodone-D6
Hydromorphone-D3
Meconin-D3
Meperidine-D4
Methadone-D8
6-MAM-D6
Morphine-D3
Naloxone-D5
Naltrexone-D3
Norbuprenorphine-D3
Norcodeine-D3
Norfentanyl-D5
Normeperidine-D4
Norpropoxyphene-D5
Nortilidine-D2
O-DM-Tramadol-D6
Oxycodone-D6
Oxymorphone-D3
Papaverine-D3
Propoxyphene-D4
Sufentanil-D4
Tapentadol-D3
Thebaine-D3
Tilidine-D5
Tramadol-D3
Zaleplon-D3
Zolpidem-D5
Zopiclone-D3
Ketamine-D4
LSD-D3
Mescaline-D9
Norketamine-D3
PCP-D5
Butalbital-D5
Pentobarbital-D5
Phenobarbital-D5
Secobarbital-D5

## Sheet: Normalization
Normalization on IS
Analytes	IS used
Amphetamine_1	Amphetamine-D5
Amphetamine_2	Amphetamine-D5
BDB_1	BDB-D2
BDB_2	BDB-D2
Butylone_1	Butylone-D2
Butylone_2	Butylone-D2
2C-B_1	2C-B-D5
2C-B_2	2C-B-D5
2C-I_1	2C-I-D5
2C-I_2	2C-I-D5
Cathinone_1	Cathinone-D5
Cathinone_2	Cathinone-D5
MBDB_1	MBDB-D4
MBDB_2	MBDB-D4
MDA_1	MDA-D4
MDA_2	MDA-D4
MDEA_1	MDEA-D4
MDEA_2	MDEA-D4
MDMA_1	MDMA-D2
MDMA_2	MDMA-D2
MDPV_1	MDPV-D7
MDPV_2	MDPV-D7
Mephedrone_1	Mephedrone-D3
Mephedrone_2	Mephedrone-D3
Methamphetamine_1	Methamphetamine-D4
Methamphetamine_2	Methamphetamine-D4
Methaqualone_1	Methaqualone-D6
Methaqualone_2	Methaqualone-D6
Methylone_1	Methylone-D2
Methylone_2	Methylone-D2
Methylphenidate_1	Methylphenidate-D10
Methylphenidate_2	Methylphenidate-D10
PMA_1	MDA-D4
PMA_2	MDA-D4
Ritalinic-acid_1	Ritalinic-acid-D4
Ritalinic-acid_2	Ritalinic-acid-D4
Alprazolam_1	Alprazolam-D6
Alprazolam_2	Alprazolam-D6
7-NH2-Clonazepam_1	7-NH2-Clonazepam-D4
7-NH2-Clonazepam_2	7-NH2-Clonazepam-D4
7-NH2-Flunitrazepam_1	7-NH2-Flunitrazepam-D3
7-NH2-Flunitrazepam_2	7-NH2-Flunitrazepam-D3
7-NH2-Nitrazepam_1	7-NH2-Nitrazepam-D5
7-NH2-Nitrazepam_2	7-NH2-Nitrazepam-D5
Bromazepam_1	Bromazepam-D4
Bromazepam_2	Bromazepam-D4
Brotizolam_1	Diazepam-D4
Brotizolam_2	Diazepam-D4
Chlordiazepoxide_1	Chlordiazepoxide-D5
Chlordiazepoxide_2	Chlordiazepoxide-D5
Clobazam_1	Clobazam-D8
Clobazam_2	Clobazam-D8
Clonazepam_1	Clonazepam-D4
Clonazepam_2	Clonazepam-D4
Demoxepam_1	Demoxepam-D5
Demoxepam_2	Demoxepam-D5
DA-Flurazepam_1	DA-Flurazepam-D4
DA-Flurazepam_2	DA-Flurazepam-D4
DM-Flunitrazepam_1	DM-Flunitrazepam-D4
DM-Flunitrazepam_2	DM-Flunitrazepam-D4
Diazepam_1	Diazepam-D4
Diazepam_2	Diazepam-D4
Estazolam_1	Estazolam-D4
Estazolam_2	Estazolam-D4
Flunitrazepam_1	Flunitrazepam-D3
Flunitrazepam_2	Flunitrazepam-D3
Flurazepam_1	Flurazepam-D10
Flurazepam_2	Flurazepam-D10
OH-Alprazolam_1	OH-Alprazolam-D5
OH-Alprazolam_2	OH-Alprazolam-D5
OH-Midazolam_1	OH-Midazolam-D4
OH-Midazolam_2	OH-Midazolam-D4
OH-Triazolam_1	OH-Triazolam-D6
OH-Triazolam_2	OH-Triazolam-D6
OH-Bromazepam_1	OH-Bromazepam-D4
OH-Bromazepam_2	OH-Bromazepam-D4
Lorazepam_1	Lorazepam-D4
Lorazepam_2	Lorazepam-D4
Lormetazepam_1	Lormetazepam-D8
Lormetazepam_2	Lormetazepam-D8
Medazepam_1	Medazepam-D4
Medazepam_2	Medazepam-D4
Midazolam_1	Midazolam-D6
Midazolam_2	Midazolam-D6
Nitrazepam_1	Nitrazepam-D5
Nitrazepam_2	Nitrazepam-D5
Norclobazam_1	Norclobazam-D6
Norclobazam_2	Norclobazam-D6
Nordiazepam_1	Nordiazepam-D5
Nordiazepam_2	Nordiazepam-D5
Oxazepam_1	Oxazepam-D5
Oxazepam_2	Oxazepam-D5
Prazepam_1	Prazepam-D4
Prazepam_2	Prazepam-D4
Temazepam_1	Temazepam-D6
Temazepam_2	Temazepam-D6
Triazolam_1	Triazolam-D6
Triazolam_2	Triazolam-D6
Gabapentin_1	Gabapentin-D4
Gabapentin_2	Gabapentin-D4
Pregebalin_1	Pregebalin-D4
Pregebalin_2	Pregebalin-D4
Promethazine_1	Promethazine-D5
Promethazine_2	Promethazine-D5
Quetiapine_1	Quetiapine-D3
Quetiapine_2	Quetiapine-D3
Benzoylecgonine_1	Benzoylecgonine-D3
Benzoylecgonine_2	Benzoylecgonine-D3
Cocaethylene_1	Cocaethylene-D2
Cocaethylene_2	Cocaethylene-D2
Cocaine_1	Cocaine-D2
Cocaine_2	Cocaine-D2
Norcocaine_1	Norcocaine-D2
Norcocaine_2	Norcocaine-D2
THC-COOH_1	THC-COOH-D3
THC-COOH_2	THC-COOH-D3
Acetylcodeine_1	Acetylcodeine-D3
Acetylcodeine_2	Acetylcodeine-D3
Buprenorphine_1	Buprenorphine-D4
Buprenorphine_2	Buprenorphine-D4
Codeine_1	Codeine-D6
Codeine_2	Codeine-D6
Dihydrocodeine_1	Dihydrocodeine-D6
Dihydrocodeine_2	Dihydrocodeine-D6
EDDP_1	EDDP-D3
EDDP_2	EDDP-D3
Fentanyl_1	Fentanyl-D5
Fentanyl_2	Fentanyl-D5
Hydrocodone_1	Hydrocodone-D6
Hydrocodone_2	Hydrocodone-D6
Hydromorphone_1	Hydromorphone-D3
Hydromorphone_2	Hydromorphone-D3
Meconin_1	Meconin-D3
Meconin_2	Meconin-D3
Meperidine_1	Meperidine-D4
Meperidine_2	Meperidine-D4
Methadone_1	Methadone-D8
Methadone_2	Methadone-D8
6-MAM_1	6-MAM-D6
6-MAM_2	6-MAM-D6
Morphine_1	Morphine-D3
Morphine_2	Morphine-D3
Naloxone_1	Naloxone-D5
Naloxone_2	Naloxone-D5
Naltrexone_1	Naltrexone-D3
Naltrexone_2	Naltrexone-D3
Norbuprenorphine_1	Norbuprenorphine-D3
Norbuprenorphine_2	Norbuprenorphine-D3
Norcodeine_1	Norcodeine-D3
Norcodeine_2	Norcodeine-D3
Norfentanyl_1	Norfentanyl-D5
Norfentanyl_2	Norfentanyl-D5
Normeperidine_1	Normeperidine-D4
Normeperidine_2	Normeperidine-D4
Nortapentadol_1	Tapentadol-D3
Nortapentadol_2	Tapentadol-D3
Nortilidine_1	Nortilidine-D2
Nortilidine_2	Nortilidine-D2
O-DM-Tramadol_1	O-DM-Tramadol-D6
O-DM-Tramadol_2	O-DM-Tramadol-D6
Oxycodone_1	Oxycodone-D6
Oxycodone_2	Oxycodone-D6
Oxymorphone_1	Oxymorphone-D3
Oxymorphone_2	Oxymorphone-D3
Papaverine_1	Papaverine-D3
Papaverine_2	Papaverine-D3
Propoxyphene_1	Propoxyphene-D4
Propoxyphene_2	Propoxyphene-D4
Sufentanil_1	Sufentanil-D4
Sufentanil_2	Sufentanil-D4
Tapentadol_1	Tapentadol-D3
Tapentadol_2	Tapentadol-D3
Thebaine_1	Thebaine-D3
Thebaine_2	Thebaine-D3
Tilidine_1	Tilidine-D5
Tilidine_2	Tilidine-D5
Tramadol_1	Tramadol-D3
Tramadol_2	Tramadol-D3
Zaleplon_1	Zaleplon-D3
Zaleplon_2	Zaleplon-D3
Zolpidem_1	Zolpidem-D5
Zolpidem_2	Zolpidem-D5
Zopiclone_1	Zopiclone-D3
Zopiclone_2	Zopiclone-D3
Ketamine_1	Ketamine-D4
Ketamine_2	Ketamine-D4
LSD_1	LSD-D3
LSD_2	LSD-D3
Mescaline_1	Mescaline-D9
Mescaline_2	Mescaline-D9
Norketamine_1	Norketamine-D3
Norketamine_2	Norketamine-D3
O-H-LSD_1	Ritalinic-acid-D4
O-H-LSD_2	Ritalinic-acid-D4
PCP_1	PCP-D5
PCP_2	PCP-D5
Allobarbital_1
Allobarbital_2
Amobarbital_1
Amobarbital_2
Barbital_1
Barbital_2
Butalbital_1	Butalbital-D5
Butalbital_2	Butalbital-D5
Hexobarbital_1	Secobarbital-D5
Pentobarbital_1	Pentobarbital-D5
Pentobarbital_2	Pentobarbital-D5
Phenobarbital_1	Phenobarbital-D5
Phenobarbital_2	Phenobarbital-D5
Secbutabarbital_1	Butalbital-D5
Secbutabarbital_2	Butalbital-D5
Secobarbital_1	Secobarbital-D5
Secobarbital_2	Secobarbital-D5
Thiopental_1	Secobarbital-D5
Thiopental_2	Secobarbital-D5

## Sheet: Concentrations CAL and QC
Concentrations of standards
Standard	Amphetamine	BDB	Butylone	2C-B	2C-I	Cathinone	MBDB	MDA	MDEA	MDMA	MDPV	Mephedrone	Methamphetamine	Methaqualone	Methylone	Methylphenidate	PMA	Ritalinic-acid	Alprazolam	7-NH2-Clonazepam	7-NH2-Flunitrazepam	7-NH2-Nitrazepam	Bromazepam	Brotizolam	Chlordiazepoxide	Clobazam	Clonazepam	Demoxepam	DA-Flurazepam	DM-Flunitrazepam	Diazepam	Estazolam	Flunitrazepam	Flurazepam	OH-Alprazolam	OH-Midazolam	OH-Triazolam	OH-Bromazepam	Lorazepam	Lormetazepam	Medazepam	Midazolam	Nitrazepam	Norclobazam	Nordiazepam	Oxazepam	Prazepam	Temazepam	Triazolam
CAL0	0	0	0	0	0	0	0	0	0	0	0	0	0	0	0	0	0	0	0	0	0	0	0	0	0	0	0	0	0	0	0	0	0	0	0	0	0	0	0	0	0	0	0	0	0	0	0	0	0
CAL1	26.9	26.7	28.2	23.9	23.7	27.5	26.2	25.2	26.7	25.8	27.1	26.8	27	27.6	24.6	27.5	27.3	25.5	26.1	23.1	22.8	29.6	26.9	27.9	21.1	28	25.6	27.2	27.2	28.9	26.4	29.9	26.2	26.9	25.4	25.9	24.9	25.5	24.9	26.7	27.5	25.2	21.7	28.7	27.2	25.2	28.8	25.4	27
CAL2	43.4	43.4	44.2	38.6	41.8	44.7	42.6	42.4	42.1	39.6	42.9	41.9	43.3	42.4	39.1	43.6	42	40.3	42	37.7	36.9	50.2	42.3	44.7	34	42.1	40.4	43.2	42.5	45.4	42.9	46.8	41.5	41.2	40.9	42.4	41.2	40.7	41.3	44.4	44.7	39.3	37	44.9	44.8	41.3	45.6	41.8	43.1
CAL3	107	105	106	95.4	105	109	106	107	103	94.1	106	102	106	101	96.3	106	97.5	95.4	104	94.4	97	121	103	111	96.2	96.9	98.8	111	104	109	106	106	102	99.4	100	106	102	99.5	104	112	110	94.5	97.4	110	109	100	110	108	105
CAL4	208	205	210	189	198	215	210	219	206	188	210	206	209	196	192	209	186	186	205	189	197	236	202	223	200	187	196	222	203	211	213	204	205	197	197	206	201	199	210	226	217	186	202	218	215	197	214	227	210
CAL5	344	339	362	332	319	362	359	385	362	330	362	359	358	334	332	352	320	315	351	328	343	321	345	379	344	324	335	384	350	356	362	350	358	341	336	344	342	338	368	387	365	316	360	373	375	334	360	403	369
CAL6	669	663	744	828	595	724	724	871	771	716	746	760	736	684	697	680	723	627	702	659	721	741	717	790	713	669	674	814	734	715	745	735	771	728	690	661	677	688	780	800	719	640	795	765	812	697	715	890	856
QCI	53.9	53.8	54.5	48.1	53.3	56.4	53.2	52.8	52.4	48.1	53.2	52.3	53.5	51.9	48.5	54.4	51.3	49.9	52.4	46.9	47.3	60.8	52.4	55.9	36.2	51.2	50	48.7	52.5	55.9	53.6	56.4	51.4	51.1	50.7	53	51.5	50.3	51.4	55.8	55.5	48.7	46.6	55.4	56.4	51.6	56.3	52.5	53
QCII	157	154	157	141	153	166	158	160	153	140	158	154	156	147	143	157	141	140	154	141	145	179	150	165	148	141	146	165	151	161	158	154	152	147	149	154	153	148	156	167	161	139	148	164	159	148	160	164	157
QCIII	513	501	551	539	461	559	542	614	565	515	554	556	545	509	515	519	511	471	525	493	526	570	529	586	539	493	506	597	540	537	557	540	560	534	512	504	509	512	577	595	548	479	570	568	575	516	545	639	585
[truncated: 59 more columns]

## Sheet: Compound_parameters pos
Positive ionization
Compound/IS	Q1 mass (Da)	Q3 mass(Da)	RT	DP	EP	CE	CXP
Amphetamine_1	137.1	92.0	3.4	30	10	21	10
Amphetamine_2	137.1	120.1	3.41	30	10	11	10
Amphetamine-D5	142.1	93.0	3.36	30	10	21	10
BDB_1	194.1	147.1	5.02	30	10	18	10
BDB_2	194.1	177.1	5.02	30	10	11	10
BDB-D2	196.1	149.1	5	30	10	18	10
Butylone_1	223.1	175.1	5.23	30	10	23	10
Butylone_2	223.1	130.1	5.22	30	10	59	10
Butylone-D2	225.1	177.1	5.21	30	10	27	10
2C-B_1	261.1	244.1	5.95	20	10	17	10
2C-B_2	261.1	228.1	5.95	20	10	29	10
2C-B-D5	266.1	249.1	5.88	20	10	17	10
2C-I_1	309.2	292.1	6.62	20	10	19	10
2C-I_2	309.2	277.1	6.61	20	10	33	10
2C-I-D5	314.2	297.1	6.56	20	10	19	10
Cathinone_1	150.1	105.1	3.08	30	10	25	10
Cathinone_2	150.1	117.1	3.07	30	10	31	10
Cathinone-D5	155.1	110.1	3.01	30	10	25	10
MBDB_1	209.1	136.1	5.55	25	10	27	10
MBDB_2	209.1	178.1	5.55	25	10	15	10
MBDB-D4	213.1	136.1	5.51	25	10	27	10
MDA_1	180.1	133.1	4.12	40	10	25	10
MDA_2	181.1	164.1	4.14	40	10	15	10
MDA-D4	185.1	138.1	4.09	40	10	25	10
MDEA_1	209.1	164.1	5.25	40	10	19	10
MDEA_2	209.1	106.1	5.25	40	10	39	10
MDEA-D4	213.1	163.1	5.22	40	10	19	10
MDMA_1	195.1	164.1	4.7	30	10	17	10
MDMA_2	195.1	106.1	4.7	30	10	33	10
MDMA-D2	197.1	163.1	4.68	30	10	17	10
MDPV_1	277.1	127.1	6.86	25	10	35	10
MDPV_2	277.1	176.1	6.85	25	10	31	10
MDPV-D7	284.1	134.1	6.82	25	10	37	10
Mephedrone_1	179.1	161.1	5.05	30	10	17	10
Mephedrone_2	179.1	145.1	5.05	30	10	29	10
Mephedrone-D3	181.1	163.1	5.04	30	10	17	10
Methamphetamine_1	151.1	92.0	4.08	40	10	25	10
Methamphetamine_2	151.1	120.1	4.08	40	10	15	10
Methamphetamine-D4	155.1	92.0	4.05	40	10	25	10
Methaqualone_1	252.1	133.1	7.79	110	10	37	10
Methaqualone_2	252.1	66.0	7.79	110	10	79	10
Methaqualone-D6	258.1	139.1	7.74	110	10	39	10
Methylone_1	209.1	161.1	4.41	50	10	25	10
Methylone_2	209.1	133.1	4.41	50	10	37	10
Methylone-D2	211.1	163.1	4.4	50	10	25	10
Methylphenidate_1	234.1	85.0	6.19	46	10	25	10
Methylphenidate_2	234.1	56.0	6.19	130	10	48	10
Methylphenidate-D10	244.1	93.0	6.13	130	10	48	10
PMA_1	167.1	122.1	4.21	20	10	25	10
PMA_2	167.1	150.1	4.21	20	10	13	10
Ritalinic-acid_1	221.1	85.0	5	40	10	25	10
Ritalinic-acid_2	220.1	56.0	5	40	10	61	10
Ritalinic-acid-D4	224.1	88.0	4.97	40	10	25	10
Alprazolam_1	310.2	282.1	8.69	80	10	37	10
Alprazolam_2	310.2	206.1	8.69	80	10	57	10
Alprazolam-D6	316.2	288.1	8.66	80	10	37	10
7-NH2-Clonazepam_1	286.1	222.1	5.03	105	10	35	10
7-NH2-Clonazepam_2	286.1	121.1	5.04	105	10	39	10
7-NH2-Clonazepam-D4	290.1	226.1	4.99	105	10	35	10
7-NH2-Flunitrazepam_1	285.1	136.1	5.93	100	10	37	10
7-NH2-Flunitrazepam_2	284.1	227.1	5.93	100	10	33	10
7-NH2-Flunitrazepam-D3	287.1	138.1	5.89	100	10	37	10
7-NH2-Nitrazepam_1	252.1	122.1	4.19	85	10	36	10
7-NH2-Nitrazepam_2	252.1	146.1	4.2	85	10	38	10
7-NH2-Nitrazepam-D5	257.1	121.1	4.15	85	10	36	10
Bromazepam_1	316.1	209.1	7.22	100	10	35	10
Bromazepam_2	316.1	182.1	7.22	100	10	43	10
Bromazepam-D4	320.1	213.1	7.18	100	10	35	10
Brotizolam_1	393.2	282.1	8.98	100	10	43	10
Brotizolam_2	394.2	315.1	8.98	100	10	33	10
Chlordiazepoxide_1	301.2	283.1	7.35	50	10	33	10
Chlordiazepoxide_2	300.2	247.1	7.35	50	10	45	10
Chlordiazepoxide-D5	305.2	286.1	7.31	50	10	31	10
Clobazam_1	302.2	260.1	8.29	120	10	29	10
Clobazam_2	301.2	224.1	8.29	120	10	45	10
Clobazam-D8	309.2	267.1	8.25	120	10	31	10
Clonazepam_1	316.2	270.1	7.71	70	10	35	10
Clonazepam_2	316.2	214.1	7.71	70	10	52	10
Clonazepam-D4	320.2	274.1	7.68	70	10	35	10
Demoxepam_1	287.1	180.1	7.43	110	10	31	10
Demoxepam_2	287.1	269.1	7.43	110	10	39	10
Demoxepam-D5	292.1	180.1	7.4	110	10	33	10
DA-Flurazepam_1	289.1	140.1	7.92	110	10	41	10
DA-Flurazepam_2	289.1	226.1	7.92	110	10	39	10
DA-Flurazepam-D4	293.1	140.1	7.89	110	10	43	10
DM-Flunitrazepam_1	300.2	254.1	7.41	30	10	35	10
DM-Flunitrazepam_2	300.2	198.1	7.41	30	10	51	10
DM-Flunitrazepam-D4	304.2	258.1	7.38	30	10	35	10
Diazepam_1	286.1	155.1	9.09	100	10	35	10
Diazepam_2	286.1	194.1	9.08	100	10	43	10
Diazepam-D4	290.1	154.1	9.06	100	10	37	10
Estazolam_1	296.1	268.1	8.54	75	10	33	10
Estazolam_2	296.1	206.1	8.54	75	10	57	10
Estazolam-D4	300.1	272.1	8.51	75	10	47	10
Flunitrazepam_1	315.2	269.1	8.3	80	10	35	10
Flunitrazepam_2	314.2	239.1	8.3	80	10	45	10
Flunitrazepam-D3	317.2	271.1	8.28	80	10	35	10
Flurazepam_1	388.2	315.1	8.18	90	10	35	10
Flurazepam_2	388.2	288.1	8.18	90	10	35	10
Flurazepam-D10	398.2	315.1	8.15	90	10	33	10
OH-Alprazolam_1	325.2	297.1	8.13	110	10	37	10
OH-Alprazolam_2	325.2	216.1	8.14	110	10	53	10
OH-Alprazolam-D5	330.2	302.1	8.1	110	10	37	10
OH-Midazolam_1	342.2	203.1	8.08	70	10	35	10
OH-Midazolam_2	342.2	168.1	8.08	70	10	51	10
OH-Midazolam-D4	346.2	328.1	8.05	70	10	31	10
OH-Triazolam_1	359.2	331.1	7.97	105	10	39	10
OH-Triazolam_2	359.2	176.1	7.97	105	10	37	10
OH-Triazolam-D6	365.2	337.1	7.93	105	10	39	10
OH-Bromazepam_1	332.2	303.1	6.37	80	10	27	10
OH-Bromazepam_2	332.2	315.1	6.38	80	10	21	10
OH-Bromazepam-D4	336.2	307.1	6.34	80	10	28	10
Lorazepam_1	321.2	229.1	7.58	60	10	42	10
Lorazepam_2	321.2	303.1	7.58	60	10	21	10
Lorazepam-D4	325.2	233.1	7.55	60	10	42	10
Lormetazepam_1	336.2	290.1	8.42	50	10	35	10
Lormetazepam_2	335.2	177.1	8.41	50	10	53	10
Lormetazepam-D8	342.2	296.1	8.4	50	10	35	10
Medazepam_1	271.1	242.1	8.94	60	10	27	10
Medazepam_2	272.1	208.1	8.94	60	10	39	10
Medazepam-D4	275.1	246.1	8.92	60	10	27	10
Midazolam_1	327.2	292.1	8.32	130	10	39	10
Midazolam_2	326.2	249.1	8.32	130	10	51	10
Midazolam-D6	332.2	297.1	8.29	130	10	39	10
Nitrazepam_1	282.1	236.1	7.69	100	10	33	10
Nitrazepam_2	282.1	180.1	7.68	100	10	51	10
Nitrazepam-D5	287.1	185.1	7.65	100	10	49	10
Norclobazam_1	287.1	245.1	7.57	70	10	29	10
Norclobazam_2	287.1	210.1	7.57	70	10	43	10
Norclobazam-D6	293.1	251.1	7.57	70	10	31	10
Nordiazepam_1	271.1	140.1	8.28	90	10	37	10
Nordiazepam_2	271.1	165.1	8.28	90	10	38	10
Nordiazepam-D5	276.1	140.1	8.24	90	10	37	10
Oxazepam_1	287.1	163.1	7.78	80	10	49	10
Oxazepam_2	287.1	104.1	7.78	80	10	45	10
Oxazepam-D5	292.1	163.1	7.75	80	10	49	10
Prazepam_1	326.2	272.1	9.74	60	10	31	10
Prazepam_2	326.2	140.1	9.74	60	10	49	10
Prazepam-D4	330.2	276.1	9.72	60	10	47	10
Temazepam_1	302.2	256.1	8.59	20	10	31	10
Temazepam_2	301.2	177.1	8.58	20	10	51	10
Temazepam-D6	308.2	262.1	8.56	20	10	29	10
Triazolam_1	343.2	308.1	8.53	140	10	37	10
Triazolam_2	343.2	315.1	8.53	140	10	39	10
Triazolam-D6	349.2	312.1	8.51	140	10	39	10
Gabapentin_1	172.1	137.1	3.47	100	10	23	10
Gabapentin_2	172.1	154.1	3.47	100	10	19	10
Gabapentin-D4	176.1	139.1	3.44	100	10	23	10
Pregebalin_1	160.1	55.0	2.79	100	10	31	10
Pregebalin_2	160.1	83.0	2.79	100	10	21	10
Pregebalin-D4	164.1	57.0	2.75	100	10	29	10
Promethazine_1	286.1	87.0	8.6	55	10	25	10
Promethazine_2	286.1	199.1	8.6	55	10	43	10
Promethazine-D5	291.1	92.0	8.57	55	10	21	10
Quetiapine_1	385.2	254.1	8.4	80	10	30	10
Quetiapine_2	385.2	222.1	8.4	80	10	49	10
Quetiapine-D3	388.2	255.1	8.4	80	10	30	10
Benzoylecgonine_1	291.1	169.1	5.15	45	10	24	10
Benzoylecgonine_2	290.1	82.0	5.15	45	10	32	10
Benzoylecgonine-D3	293.1	171.1	5.14	45	10	24	10
Cocaethylene_1	319.2	197.1	7.31	70	10	27	10
Cocaethylene_2	318.2	82.0	7.31	70	10	37	10
Cocaethylene-D2	321.2	199.1	7.3	70	10	27	10
Cocaine_1	305.2	183.1	6.65	40	10	26	10
Cocaine_2	304.2	77.0	6.66	40	10	75	10
Cocaine-D2	307.2	185.1	6.65	56	10	26	10
Norcocaine_1	291.1	169.1	6.77	50	10	21	10
Norcocaine_2	290.1	105.1	6.77	50	10	44	10
Norcocaine-D2	293.1	171.1	6.75	50	10	23	10
THC-COOH_1	345.2	299.1	9.84	40	10	27	10
THC-COOH_2	345.2	193.1	9.84	40	10	35	10
THC-COOH-D3	348.2	302.1	9.83	40	10	27	10
Acetylcodeine_1	342.2	225.1	6.51	130	10	35	10
Acetylcodeine_2	342.2	165.1	6.51	130	10	65	10
Acetylcodeine-D3	345.2	225.1	6.5	130	10	37	10
Buprenorphine_1	468.2	396.1	7.8	120	10	53	10
Buprenorphine_2	468.2	414.1	7.79	120	10	46	10
Buprenorphine-D4	472.2	400.1	7.77	120	10	53	10
Codeine_1	300.2	215.1	4.29	110	10	35	10
Codeine_2	300.2	165.1	4.29	110	10	55	10
Codeine-D6	306.2	218.1	4.25	110	10	35	10
Dihydrocodeine_1	302.2	199.1	4.22	120	10	45	10
Dihydrocodeine_2	302.2	128.1	4.22	120	10	79	10
Dihydrocodeine-D6	308.2	202.1	4.17	120	10	43	10
EDDP_1	279.1	234.1	9	40	10	43	10
EDDP_2	279.1	250.1	9.01	40	10	33	10
EDDP-D3	281.1	234.1	8.99	40	10	43	10
Fentanyl_1	337.2	188.1	7.87	80	10	31	10
Fentanyl_2	337.2	105.1	7.87	80	10	52	10
Fentanyl-D5	342.2	188.1	7.83	80	10	31	10
Hydrocodone_1	300.2	199.1	4.77	160	10	39	10
Hydrocodone_2	300.2	171.1	4.77	160	10	51	10
Hydrocodone-D6	306.2	202.1	4.73	160	10	41	10
Hydromorphone_1	286.1	185.1	3.15	120	10	39	10
Hydromorphone_2	286.1	157.1	3.14	120	10	53	10
Hydromorphone-D3	289.1	185.1	3.11	120	10	41	10
Meconin_1	195.1	105.1	5.71	50	10	43	10
Meconin_2	195.1	77.0	5.71	50	10	48	10
Meconin-D3	198.1	105.1	5.69	50	10	40	10
Meperidine_1	248.1	174.1	6.36	90	10	27	10
Meperidine_2	248.1	70.0	6.36	90	10	35	10
Meperidine-D4	252.1	178.1	6.34	90	10	29	10
Methadone_1	311.2	265.1	9.49	40	10	21	10
Methadone_2	311.2	106.1	9.49	40	10	33	10
Methadone-D8	319.2	268.1	9.46	40	10	21	10
6-MAM_1	328.2	165.1	4.28	130	10	52	10
6-MAM_2	328.2	211.1	4.28	130	10	35	10
6-MAM-D6	334.2	165.1	4.26	130	10	52	10
Morphine_1	286.1	165.1	2.66	120	10	52	10
Morphine_2	286.1	201.1	2.66	120	10	35	10
Morphine-D3	289.1	165.1	2.63	120	10	52	10
Naloxone_1	328.2	310.1	4.03	110	10	27	10
Naloxone_2	328.2	212.1	4.03	110	10	53	10
Naloxone-D5	333.2	315.1	3.99	110	10	27	10
Naltrexone_1	342.2	270.1	4.67	70	10	37	10
Naltrexone_2	342.2	267.1	4.67	70	10	37	10
Naltrexone-D3	345.2	270.1	4.64	70	10	39	10
Norbuprenorphine_1	414.2	83.0	6.85	120	10	73	10
Norbuprenorphine_2	414.2	187.1	6.85	120	10	48	10
Norbuprenorphine-D3	417.2	83.0	6.84	120	10	73	10
Norcodeine_1	286.1	165.1	3.59	120	10	57	10
Norcodeine_2	286.1	152.1	3.59	120	10	81	10
Norcodeine-D3	289.1	152.1	3.55	120	10	83	10
Norfentanyl_1	233.1	84.0	5.69	55	10	23	10
Norfentanyl_2	233.1	55.0	5.69	55	10	53	10
Norfentanyl-D5	238.1	84.0	5.65	55	10	25	10
Normeperidine_1	235.1	161.1	6.3	70	10	23	10
Normeperidine_2	234.1	188.1	6.3	70	10	19	10
Normeperidine-D4	238.1	164.1	6.28	70	10	23	10
Nortapentadol_1	209.1	108.1	5.34	62	10	30	10
Nortapentadol_2	208.1	121.1	5.35	28	10	62	10
Nortilidine_1	261.1	155.1	6.46	30	10	24	10
Nortilidine_2	261.1	230.1	6.46	30	10	15	10
Nortilidine-D2	263.1	155.1	6.45	30	10	24	10
O-DM-Tramadol_1	250.1	58.0	4.23	120	10	47	10
O-DM-Tramadol_2	250.1	42.0	4.23	120	10	105	10
O-DM-Tramadol-D6	256.1	64.0	4.21	120	10	49	10
Oxycodone_1	316.2	298.1	4.58	90	10	27	10
Oxycodone_2	316.2	241.1	4.58	90	10	39	10
Oxycodone-D6	322.2	304.1	4.53	90	10	27	10
Oxymorphone_1	302.2	227.1	2.78	110	10	37	10
Oxymorphone_2	302.2	284.1	2.78	110	10	27	10
Oxymorphone-D3	305.2	230.1	2.74	110	10	37	10
Papaverine_1	341.2	203.1	8.24	114	10	36	10
Papaverine_2	340.2	296.1	8.24	114	10	47	10
Papaverine-D3	343.2	205.1	8.21	114	10	40	10
Propoxyphene_1	341.2	58.0	8.34	50	10	49	10
Propoxyphene_2	341.2	267.1	8.34	50	10	13	10
Propoxyphene-D4	345.2	58.0	8.32	50	10	13	10
Sufentanil_1	388.2	238.1	8.57	70	10	27	10
Sufentanil_2	388.2	112.1	8.56	70	10	47	10
Sufentanil-D4	392.2	238.1	8.54	70	10	27	10
Tapentadol_1	223.1	108.1	5.45	20	10	33	10
Tapentadol_2	222.1	121.1	5.45	20	10	29	10
Tapentadol-D3	225.1	107.1	5.45	20	10	33	10
Thebaine_1	312.2	58.0	7.36	30	10	45	10
Thebaine_2	312.2	251.1	7.36	30	10	41	10
Thebaine-D3	315.2	61.0	7.35	30	10	45	10
Tilidine_1	275.1	155.1	6.98	40	10	27	10
Tilidine_2	275.1	78.0	6.98	40	10	63	10
Tilidine-D5	280.1	155.1	6.96	40	10	31	10
Tramadol_1	265.1	58.1	5.88	40	10	45	10
Tramadol_2	264.1	42.1	5.88	40	10	105	10
Tramadol-D3	267.1	58.1	5.86	40	10	51	10
Zaleplon_1	307.2	237.1	8.22	100	10	37	10
Zaleplon_2	307.2	234.1	8.22	100	10	53	10
Zaleplon-D3	311.2	237.1	8.19	100	10	40	10
Zolpidem_1	309.2	235.1	7.6	25	10	47	10
Zolpidem_2	309.2	264.1	7.6	25	10	37	10
Zolpidem-D5	314.2	235.1	7.55	25	10	53	10
Zopiclone_1	390.2	246.1	6.58	30	10	23	10
Zopiclone_2	390.2	218.1	6.59	30	10	46	10
Zopiclone-D3	393.2	245.1	6.57	30	10	23	10
Ketamine_1	239.1	126.1	6.23	40	10	33	10
Ketamine_2	238.1	220.1	6.23	40	10	20	10
Ketamine-D4	242.1	129.1	6.19	40	10	33	10
LSD_1	324.2	223.1	7.06	25	10	33	10
LSD_2	324.2	208.1	7.07	25	10	41	10
LSD-D3	327.2	226.1	7.05	25	10	33	10
Mescaline_1	212.1	165.1	3.43	20	10	31	10
Mescaline_2	212.1	180.1	3.43	20	10	25	10
Mescaline-D9	221.1	171.1	3.34	20	10	31	10
Norketamine_1	225.1	126.1	5.63	50	10	35	10
Norketamine_2	225.1	208.1	5.63	50	10	17	10
Norketamine-D3	228.1	129.1	5.58	50	10	33	10
O-H-LSD_1	356.2	222.1	4.82	60	10	45	10
O-H-LSD_2	356.2	166.1	4.82	60	10	71	10
PCP_1	244.1	86.0	8.41	40	10	17	10
PCP_2	244.1	91.0	8.41	40	10	37	10
PCP-D5	249.1	86.0	8.38	40	10	17	10

## Sheet: Compound_parameters neg
Negative ionization
Compound/IS	Q1 mass (Da)	Q3 mass (Da)	RT	DP	EP	CP	CXP
Allobarbital_1	207	42.0	4.08	50	10	40	10
Allobarbital_2	207	84.9	4.08	50	10	17	10
Amobarbital_1	225	42.0	5.91	50	10	45	10
Amobarbital_2	225	181.9	5.91	50	10	18	10
Barbital_1	183	42.0	2.83	50	10	40	10
Barbital_2	183	139.9	2.83	50	10	17	10
Butalbital_1	223	42.0	5.26	50	10	45	10
Butalbital_2	223	179.9	5.26	50	10	17	10
Butalbital-D5	228	42.0	5.23	50	10	40	10
Hexobarbital_1	234.9	42.0	6.28	45	10	45	10
Pentobarbital_1	225	42.0	6.01	55	10	40	10
Pentobarbital_2	225	181.9	6.01	55	10	17	10
Pentobarbital-D5	230	42.0	5.99	55	10	40	10
Phenobarbital_1	230.9	42.0	5.05	35	10	40	10
Phenobarbital_2	230.9	187.9	5.05	35	10	15	10
Phenobarbital-D5	235.9	42.0	5.01	35	10	40	10
Secbutabarbital_1	211	42.0	5.09	40	10	40	10
Secbutabarbital_2	211	167.9	5.09	40	10	20	10
Secobarbital_1	236.9	42	6.37	40	10	40	10
Secobarbital_2	236.9	193.9	6.37	40	10	17	10
Secobarbital-D5	241.9	42.0	6.37	40	10	40	10
Thiopental_1	240.9	58.0	6.74	35	10	45	10
Thiopental_2	240.9	100.9	6.74	35	10	20	10

## Sheet: LOD_LOQ 
Compound	LOQ (µg/L)	LOD (µg/L)
Amphetamine	10.85	2.17
BDB	26.7	2.17
Butylone	11.05	0.442
2C-B	23.9	1.93
2C-I	10.45	2.09
Cathinone	11175	2235
MBDB	10.65	0.426
MDA	25.2	0.212
MDEA	26.7	0.421
MDMA	25.8	0.396
MDPV	27.1	2145
Mephedrone	26.8	2095
Methamphetamine	4.33	0.433
Methaqualone	27.6	2.12
Methylone	3.91	1955
Methylphenidate	27.5	2.18
PMA	27.3	2.1
Ritalinic acid	25.5	2015
Alprazolam	26.1	0.21
7-Aminoclonazepam	9425	0.1885
7-Aminoflunitrazepam	9225	1845
7-Aminonitrazepam	29.6	0.251
Bromazepam	26.9	2115
Brotizolam	27.9	2235
Chlordiazepoxide	8.5	8.5
Clobazam	28	0.2105
Clonazepam	25.6	0.404
Demoxepam	2.16	0.432
Desalkylflurazepam	27.2	0.2125
Desmethylflunitrazepam	28.9	0.227
Diazepam	10725	4.29
Estazolam	29.9	2.34
Flunitrazepam	26.2	4.15
Flurazepam	26.9	2.06
α-Hydroxyalprazolam	25.4	2045
α-Hydroxymidazolam	4.24	0.212
α-Hydroxytriazolam	10.3	2.06
3-Hydroxybromazepam	25.5	2035
Lorazepam	10325	2065
Lormetazepam	26.7	2.22
Medazepam	2235	0.447
Midazolam	25.2	0.393
Nitrazepam	21.7	0.185
Norclobazam	28.7	0.449
Nordiazepam	27.2	0.224
Oxazepam	4.13	2065
Prazepam	28.8	0.228
Temazepam	25.4	2.09
Triazolam	10775	0.2155
Gabapentin	10475	2095
Pregabalin	10.25	0.205
Promethazine	10.5	2.1
Quetiapine	27.2	0.214
Benzoylecgonine	15.5	1.24
Cocaethylene	16.9	0.267
Cocaine	16.9	0.133
Norcocaine	15.5	1215
11-nor-9-Carboxy-Δ9-THC	6.96	2.65
Acetylcodeine	10975	0.022
Buprenorphine	0.843	0.0084
Codeine	4775	0.0955
Dihydrocodeine	12.2	0.0975
EDDP	26	2.04
Fentanyl	5.07	0.0392
Hydrocodone	5.6	0.112
Hydromorphone	5.49	0.0438
Meconin	9775	1955
Meperidine	13.3	0.216
Methadone	28.5	4.55
6-Monoacetylmorphine	2.68	0.2155
Morphine	1065	0.213
Naloxone	28.2	0.2235
Naltrexone	28	0.434
Norbuprenorphine	0.594	0.594
Norcodeine	5675	1135
Norfentanyl	5.81	0.0907
Normeperidine	15.1	5825
Nortapentadol	6.05	1.21
Nortilidine	27.7	2175
O-Desmethyltramadol	4.27	0.2135
Oxycodone	2125	0.2125
Oxymorphone	2.1	0.105
Papaverine	28.3	2275
Propoxyphene	28.3	0.436
Sufentanil	27.8	0.437
Tapentadol	12.9	2.03
Thebaine	25.6	0.408
Tilidine	26.3	0.42
Tramadol	2095	0.2095
Zaleplon	24.6	0.2045
Zolpidem	11175	0.447
Zopiclone	10525	0.421
Ketamine	10675	0.427
LSD	0.477	0.0372
Mescaline	5.15	0.884
Norketamine	4.54	0.454
2-Oxo-3-hydroxy-LSD	0.2125	0.0043
PCP	5.58	0.0863
Allobarbital	79.6	12.4
Amobarbital	81.5	81.5
Barbital	73.7	31.25
Butalbital	77.8	30.75
Hexobarbital	84.6	84.6
Pentobarbital	67.4	67.4
Phenobarbital	77	31
Secbutabarbital	80	31
Secobarbital	74.3	74.3
Thiopental	74.2	1.15

## Sheet: ACC_CVcalibrators
Calibrators
		INTRADAY EVALUATION															INTERDAY EVALUATION
			I				II				III
Compound	Standard	Actual Concentration	Mean	Standard Deviation	CV (%)	ACC (%)	Mean	Standard Deviation	CV (%)	ACC (%)	Mean	Standard Deviation	CV (%)	ACC (%)			CV (%)	ACC (%)
Amphetamine	CAL1	26.90	26.74	1.0548	3.9	99.4	27.3606	0.3906	1.4	101.7	26.4908	0.1933	0.7	98.5			2.00	99.87
	CAL2	43.40	44.84	3.3428	7.5	103.3	42.7125	0.8184	1.9	98.4	44.957	0.4512	1	103.6			3.47	101.76
	CAL3	107.00	104.11	0.7529	0.7	97.3	104.94	3.9494	3.8	98.1	106.615	0.6605	0.6	99.6			1.70	98.33
	CAL4	208.00	195.77	3.7531	1.9	94.1	200.774	1.2524	0.6	96.5	194.196	1.1799	0.6	93.4			1.03	94.67
	CAL5	344.00	345.90	11.8623	3.4	100.6	343.178	14.0953	4.1	99.8	348.358	4.932	1.4	101.3			2.97	100.57
	CAL6	669.00	706.44	4.1835	0.6	105.6	705.859	18.1111	2.6	105.5	693.506	1.0041	0.1	103.7			1.10	104.93
			I				II				III
Compound	Standard	Actual Concentration	Mean	Standard Deviation	CV (%)	ACC (%)	Mean	Standard Deviation	CV (%)	ACC (%)	Mean	Standard Deviation	CV (%)	ACC (%)			CV (%)	ACC (%)
MDMA	CAL1	25.8	25.3355	0.1662	0.7	98.2	25.6515	0.9824	3.8	99.4	25.418	1.5088	5.9	98.5			3.47	98.70
	CAL2	39.6	41.6646	1.842	4.4	105.2	39.8994	1.1744	2.9	100.8	39.7571	1.1251	2.8	100.4			3.37	102.13
	CAL3	94.1	92.8416	2.5364	2.7	98.7	93.8826	0.6937	0.7	99.8	98.861	0.0862	0.1	105.1			1.17	101.20
	CAL4	188	182.055	1.1524	0.6	96.8	190.394	1.6196	0.9	101.3	188.734	7.6398	4	100.4			1.83	99.50
	CAL5	330	332.566	4.018	1.2	100.8	331.221	17.5606	5.3	100.4	325.204	4.3965	1.4	98.5			2.63	99.90
	CAL6	716	724.655	37.0651	5.1	101.2	704.594	9.4885	1.3	98.4	695.146	6.0115	0.9	97.1			2.43	98.90
			I				II				III
Compound	Standard	Actual Concentration	Mean	Standard Deviation	CV (%)	ACC (%)	Mean	Standard Deviation	CV (%)	ACC (%)	Mean	Standard Deviation	CV (%)	ACC (%)			CV (%)	ACC (%)
Clonazepam	CAL1	25.6	25.0653	0.6073	2.4	97.9	25.5366	0.8261	3.2	99.8	26.041	1.3618	5.2	101.7			3.60	99.80
	CAL2	40.4	42.2719	3.9816	9.4	104.6	40.0787	1.0392	2.6	99.2	39.8729	1.93	4.8	98.7			5.60	100.83
	CAL3	98.8	102.001	0.997	1	103.2	103.581	4.4098	4.3	104.8	95.4561	3.888	4.1	96.6			3.13	101.53
	CAL4	196	188.401	3.3249	1.8	96.1	187.072	5.4038	2.9	95.4	195.602	7.4989	3.8	99.8			2.83	97.10
	CAL5	335	325.996	7.4997	2.3	97.3	340.592	7.1381	2.1	101.7	325.156	7.7091	2.4	97.1			2.27	98.70
	CAL6	674	686.297	7.2859	1.1	101.8	667.87	12.3249	1.8	99.1	715.166	22.5815	3.2	106.1			2.03	102.33
			I				II				III
Compound	Standard	Actual Concentration	Mean	Standard Deviation	CV (%)	ACC (%)	Mean	Standard Deviation	CV (%)	ACC (%)	Mean	Standard Deviation	CV (%)	ACC (%)			CV (%)	ACC (%)
Lorazepam	CAL1	24.9	23.8469	0.5149	2.2	95.8	24.4726	1.9559	8	98.3	25.4881	0.2856	1.1	102.4			3.76	98.8333
	CAL2	41.3	45.6067	0.36	0.8	110.4	42.9366	3.2404	7.5	104	40.1258	5.3316	13.3	97.2			7.20	103.867
	CAL3	104	106.681	3.1449	2.9	102.6	100.756	2.0798	2.1	96.9	101.942	5.6806	5.6	98			3.53	99.1667
	CAL4	210	206.99	4.5024	2.2	98.6	210.45	0.2626	0.1	100.2	202.58	3.3108	1.6	96.5			1.30	98.4333
	CAL5	368	345.028	28.0428	8.1	93.8	370.877	20.1412	5.4	100.8	373.502	23.0261	6.2	101.5			6.56	98.7
	CAL6	780	787.913	11.886	1.5	101	779.042	6.7052	0.9	99.9	815.082	17.265	2.1	104.5			1.50	101.8
			I				II				III
Compound	Standard	Actual Concentration	Mean	Standard Deviation	CV (%)	ACC (%)	Mean	Standard Deviation	CV (%)	ACC (%)	Mean	Standard Deviation	CV (%)	ACC (%)			CV (%)	ACC (%)
Cocaine	CAL1	16.9	16.6134	0.9972	6	98.3	17.4228	0.2994	1.7	103.1	16.607	0.3515	2.1	98.3			3.26667	99.9
	CAL2	26.6	27.9905	0.7954	2.8	105.2	25.0815	0.6201	2.5	94.3	26.9699	1.1074	4.1	101.4			3.13333	100.3
	CAL3	64.2	62.3735	1.5185	2.4	97.2	64.9627	1.6778	2.6	101.2	67.3605	0.0956	0.1	104.9			1.7	101.1
	CAL4	128	125.985	2.9442	2.3	98.4	129.697	1.2967	1	101.3	124.015	5.5898	4.5	96.9			2.6	98.8667
	CAL5	223	229.529	7.1944	3.1	102.9	225.338	5.0135	2.2	101	223.997	8.6157	3.8	100.4			3.03333	101.433
	CAL6	473	467.362	5.7796	1.2	98.8	468.52	27.6682	5.9	99.1	463.951	27.0238	5.8	98.1			4.3	98.6667
			I				II				III
Compound	Standard	Actual Concentration	Mean	Standard Deviation	CV (%)	ACC (%)	Mean	Standard Deviation	CV (%)	ACC (%)	Mean	Standard Deviation	CV (%)	ACC (%)			CV (%)	ACC (%)
Benzoylecgonine	CAL1	15.5	15.4045	1.6536	10.7	99.4	15.8694	0.082	0.5	102.4	15.2746	0.4097	2.7	98.5			4.63333	100.1
	CAL2	24.8	25.6373	2.2671	8.8	103.4	24.121	2.5233	10.5	97.3	25.4595	0.1223	0.5	102.7			6.6	101.133
	CAL3	61.7	58.2744	0.0342	0.1	94.4	59.4944	1.883	3.2	96.4	61.5485	0.6317	1	99.8			1.43333	96.8667
	CAL4	122	120.945	1.7729	1.5	99.1	124.153	6.7174	5.4	101.8	119.017	1.6643	1.4	97.6			2.76667	99.5
	CAL5	213	223.096	14.1313	6.3	104.7	209.042	2.6449	1.3	98.1	219.283	7.707	3.5	102.9			3.7	101.9
	CAL6	455	451.474	6.5342	1.4	99.2	473.302	26.7467	5.7	104	448.339	19.3869	4.3	98.5			3.8	100.567
			I				II				III
Compound	Standard	Actual Concentration	Mean	Standard Deviation	CV (%)	ACC (%)	Mean	Standard Deviation	CV (%)	ACC (%)	Mean	Standard Deviation	CV (%)	ACC (%)			CV (%)	ACC (%)
Phenobarbital	CAL1	77	73.5303	8.0613	11	95.5	73.3309	4.4308	6	95.2	76.9688	10.3206	13.4	100			10.1333	96.9
	CAL2	124	131.35	6.2993	4.8	105.9	132.867	9.3246	7	107.2	122.211	17.2638	14.1	98.6			8.63333	103.9
	CAL3	305	316.368	22.0214	7	103.7	311.072	34.8082	11.2	102	317.108	13.2825	4.2	104			7.46667	103.233
	CAL4	615	620.936	13.5788	2.2	101	629.9	40.1573	6.4	102.4	626.826	26.2747	4.2	101.9			4.26667	101.767
	CAL5	1107	1094.08	39.9923	3.7	98.8	1029.28	89.726	8.7	93	1058.27	48.6334	4.6	95.6			5.66667	95.8
	CAL6	2451	2329.75	89.7902	3.9	95.1	2456.43	56.0866	2.3	100.2	2450.83	97.2481	4	100			3.4	98.4333
			I				II				III
Compound	Standard	Actual Concentration	Mean	Standard Deviation	CV (%)	ACC (%)	Mean	Standard Deviation	CV (%)	ACC (%)	Mean	Standard Deviation	CV (%)	ACC (%)			CV (%)	ACC (%)
Morphine	CAL1	13.5	13.1825	0.6231	4.7	97.6	13.5518	0.2161	1.6	100.4	13.3497	0.0769	0.6	98.9			2.3	98.9667
	CAL2	21.3	22.5642	1.3139	5.8	105.9	20.9572	0.5915	2.8	98.4	21.5828	0.6735	3.1	101.3			3.9	101.867
	CAL3	52.1	52.1081	0.5534	1.1	100	53.44	1.5541	2.9	102.6	52.819	0.7399	1.4	101.4			1.8	101.333
	CAL4	104	102.558	0.6667	0.7	98.6	104.879	2.0396	1.9	100.8	103.384	0.743	0.7	99.4			1.1	99.6
	CAL5	181	179.986	4.0426	2.2	99.4	178.126	6.4528	3.6	98.4	182.204	0.0648	0	100.7			1.93333	99.5
	CAL6	383	381.174	3.4451	0.9	99.5	380.689	13.9297	3.7	99.4	376.613	1.4235	0.4	98.3			1.66667	99.0667
			I				II				III
Compound	Standard	Actual Concentration	Mean	Standard Deviation	CV (%)	ACC (%)	Mean	Standard Deviation	CV (%)	ACC (%)	Mean	Standard Deviation	CV (%)	ACC (%)			CV (%)	ACC (%)
6-MAM	CAL1	2.68	2.6288	0.2603	9.9	98.1	2.7497	0.0478	1.7	102.6	2.666	0.0196	0.7	99.5			4.1	100.067
	CAL2	4.31	4.6657	N/A	N/A	108.3	4.0452	0.2505	6.2	93.9	4.4076	0.3534	8	102.3			7.1	101.5
	CAL3	11.2	11.308	0.093	0.8	101	11.7593	1.1342	9.6	105	10.6397	0.6373	6	95			5.46667	100.333
	CAL4	22.9	23.0547	1.6821	7.3	100.7	22.935	1.5814	6.9	100.2	23.5164	0.5907	2.5	102.7			5.56667	101.2
	CAL5	40.8	41.678	0.0687	0.2	102.2	41.4346	0.0644	0.2	101.6	40.5563	0.4356	1.1	99.4			0.5	101.067
	CAL6	90.2	85.6433	1.1712	1.4	94.9	87.3523	3.1923	3.7	96.8	91.2515	1.8159	2	101.2			2.36667	97.6333
			I				II				III
Compound	Standard	Actual Concentration	Mean	Standard Deviation	CV (%)	ACC (%)	Mean	Standard Deviation	CV (%)	ACC (%)	Mean	Standard Deviation	CV (%)	ACC (%)			CV (%)	ACC (%)
Methadone	CAL1	28.5	28.2208	1.6382	5.8	99	28.8339	0.0468	0.2	101.2	28.5774	0.2192	0.8	100.3			2.26667	100.167
	CAL2	45.5	47.3363	2.898	6.1	104	45.0564	0.9783	2.2	99	45.6961	0.429	0.9	100.4			3.06667	101.133
	CAL3	112	108.425	0.656	0.6	96.8	109.95	2.3117	2.1	98.2	110.933	0.668	0.6	99			1.1	98
	CAL4	221	214.554	7.2898	3.4	97.1	218.412	3.7774	1.7	98.8	212.218	1.2029	0.6	96			1.9	97.3
	CAL5	378	377.96	4.2588	1.1	100	373.345	20.1499	5.4	98.8	383.655	14.3843	3.7	101.5			3.4	100.1
	CAL6	773	800.47	3.3546	0.4	103.6	804.201	39.5329	4.9	104	794.085	6.2841	0.8	102.7			2.03333	103.433
			I				II				III
Compound	Standard	Actual Concentration	Mean	Standard Deviation	CV (%)	ACC (%)	Mean	Standard Deviation	CV (%)	ACC (%)	Mean	Standard Deviation	CV (%)	ACC (%)			CV (%)	ACC (%)
EDDP	CAL1	26	25.8369	1.0657	4.1	99.4	25.9913	0.6973	2.7	100	26.0991	0.7375	2.8	100.4			3.2	99.9333
	CAL2	40.8	41.8711	2.651	6.3	102.6	40.7846	1.1407	2.8	100	40.9332	1.0966	2.7	100.3			3.93333	100.967
	CAL3	99.5	96.846	1.8919	2	97.3	101.197	1.7008	1.7	101.7	97.4898	0.7219	0.7	98			1.46667	99
	CAL4	196	194.357	3.359	1.7	99.2	190.528	0.62	0.3	97.2	191.951	1.1598	0.6	97.9			0.866667	98.1
	CAL5	341	341.839	7.0576	2.1	100.2	335.87	12.9742	3.9	98.5	348.7	10.2514	2.9	102.3			2.96667	100.333
	CAL6	716	727.276	26.2827	3.6	101.6	735.055	16.5015	2.2	102.7	724.022	18.099	2.5	101.1			2.76667	101.8
			I				II				III
Compound	Standard	Actual Concentration	Mean	Standard Deviation	CV (%)	ACC (%)	Mean	Standard Deviation	CV (%)	ACC (%)	Mean	Standard Deviation	CV (%)	ACC (%)			CV (%)	ACC (%)
Ketamine	CAL1	26.6	25.5396	0.9843	3.9	96	27.0924	1.7438	6.4	101.9	26.4474	0.7296	2.8	99.4			4.36667	99.1
	CAL2	42.7	47.5165	3.364	7.1	111.3	41.7315	0.7128	1.7	97.7	43.1258	3.4674	8	101			5.6	103.333
	CAL3	106	103.945	7.8189	7.5	98.1	103.791	6.0113	5.8	97.9	107.121	5.3628	5	101.1			6.1	99.0333
	CAL4	216	206.673	4.7296	2.3	95.7	216.882	7.2436	3.3	100.4	207.638	1.6464	0.8	96.1			2.13333	97.4
	CAL5	382	376.067	1.2773	0.3	98.4	378.817	13.3932	3.5	99.2	390.878	15.7382	4	102.3			2.6	99.9667
	CAL6	841	862.109	15.162	1.8	102.5	865.605	26.281	3	102.9	841.556	30.1527	3.6	100.1			2.8	101.833

## Sheet: ACC_CVcontrols
Quality controls
			INTRADAY EVALUATION														INTERDAY EVALUATION
			I				II				III
Compound	Standard	Actual Concentration	Mean	Standard Deviation	CV (%)	ACC (%)	Mean	Standard Deviation	CV (%)	ACC (%)	Mean	Standard Deviation	CV (%)	ACC (%)			CV (%)	ACC (%)
Amphetamine	QCI	53.9	54.2823	3.0925	5.7	100.7	52.2188	1.7355	3.3	96.9	53.5284	0.3151	0.6	99.3			3.2	98.9667
	QCII	157	157.804	1.838	1.2	100.5	149.911	0.7994	0.5	95.5	155.612	1.7157	1.1	99.1			0.933333	98.3667
	QCIII	513	531.928	43.4826	8.2	103.7	504.065	10.5639	2.1	98.3	520.158	3.0849	0.6	101.4			3.63333	101.133
			I				II				III
Compound	Standard	Actual Concentration	Mean	Standard Deviation	CV (%)	ACC (%)	Mean	Standard Deviation	CV (%)	ACC (%)	Mean	Standard Deviation	CV (%)	ACC (%)			CV (%)	ACC (%)
MDMA	QCI	48.1	49.5087	4.3036	8.7	102.9	48.3295	1.3449	2.8	100.5	49.7034	1.1268	2.3	103.3			4.6	102.233
	QCII	140	142.78	0.7088	0.5	102	137.334	1.3663	1	98.1	145.429	2.6069	1.8	103.9			1.1	101.333
	QCIII	515	519.287	46.5317	9	100.8	490.277	16.7638	3.4	95.2	501.034	11.1353	2.2	97.3			4.86667	97.7667
			I				II				III
Compound	Standard	Actual Concentration	Mean	Standard Deviation	CV (%)	ACC (%)	Mean	Standard Deviation	CV (%)	ACC (%)	Mean	Standard Deviation	CV (%)	ACC (%)			CV (%)	ACC (%)
Clonazepam	QCI	50	53.3633	1.6596	3.1	106.7	48.2478	1.3261	2.7	96.5	48.0431	1.6438	3.4	96.1			3.06667	99.7667
	QCII	146	148.411	8.1131	5.5	101.7	141.644	3.5759	2.5	97	140.675	1.7353	1.2	96.4			3.06667	98.3667
	QCIII	506	503.096	37.3141	7.4	99.4	478.552	21.021	4.4	94.6	475.162	8.9886	1.9	93.9			4.56667	95.9667
			I				II				III
Compound	Standard	Actual Concentration	Mean	Standard Deviation	CV (%)	ACC (%)	Mean	Standard Deviation	CV (%)	ACC (%)	Mean	Standard Deviation	CV (%)	ACC (%)			CV (%)	ACC (%)
Lorazepam	QCI	51.4	49.8109	4.7326	9.5	96.9	49.2845	1.767	3.6	95.9	49.5264	1.88	3.8	96.4			5.63333	96.4
	QCII	156	157.039	8.48	5.4	100.7	150.478	2.454	1.6	96.5	156.47	3.9462	2.5	100.3			3.16667	99.1667
	QCIII	577	565.795	50.2059	8.9	98.1	556.651	11.9366	2.1	96.5	559.484	21.8587	3.9	97			4.96667	97.2
			I				II				III
Compound	Standard	Actual Concentration	Mean	Standard Deviation	CV (%)	ACC (%)	Mean	Standard Deviation	CV (%)	ACC (%)	Mean	Standard Deviation	CV (%)	ACC (%)			CV (%)	ACC (%)
Cocaine	QCI	32.7	34.1548	1.3634	4	104.4	32.5089	1.8721	5.8	99.4	31.4871	0.9244	2.9	96.3			4.23333	100.033
	QCII	95.1	101.792	1.198	1.2	107	97.1361	4.8404	5	102.1	93.7614	4.0943	4.4	98.6			3.53333	102.567
	QCIII	347	348.627	19.0189	5.5	100.5	342.66	11.3145	3.3	98.7	335.476	10.2869	3.1	96.7			3.96667	98.6333
			I				II				III
Compound	Standard	Actual Concentration	Mean	Standard Deviation	CV (%)	ACC (%)	Mean	Standard Deviation	CV (%)	ACC (%)	Mean	Standard Deviation	CV (%)	ACC (%)			CV (%)	ACC (%)
Benzoylecgonine	QCI	30.8	31.6753	1.8296	5.8	102.8	31.45	0.8873	2.8	102.1	32.0733	1.4018	4.4	104.1			4.33333	103
	QCII	91.4	90.6386	0.7724	0.9	99.2	88.1289	2.9545	3.4	96.4	94.2754	2.5666	2.7	103.1			2.33333	99.5667
	QCIII	336	348.135	27.5748	7.9	103.6	318.076	15.0977	4.7	94.7	326.337	5.5033	1.7	97.1			4.76667	98.4667
			I				II				III
Compound	Standard	Actual Concentration	Mean	Standard Deviation	CV (%)	ACC (%)	Mean	Standard Deviation	CV (%)	ACC (%)	Mean	Standard Deviation	CV (%)	ACC (%)			CV (%)	ACC (%)
Phenobarbital	QCI	153	156.909	12.0217	7.7	102.6	139.759	11.0691	7.9	91.3	147.777	14.3812	9.7	96.6			8.43333	96.8333
	QCII	462	495.004	32.3971	6.5	107.1	459.875	32.9409	7.2	99.5	470.633	10.7404	2.3	101.9			5.33333	102.833
	QCIII	1754	1759.55	162.534	9.2	100.3	1662.23	68.548	4.1	94.8	1711.73	54.009	3.2	97.6			5.5	97.5667
			I				II				III
Compound	Standard	Actual Concentration	Mean	Standard Deviation	CV (%)	ACC (%)	Mean	Standard Deviation	CV (%)	ACC (%)	Mean	Standard Deviation	CV (%)	ACC (%)			CV (%)	ACC (%)
Morphine	QCI	26.5	27.2114	1.6256	6	102.7	26.1945	0.4448	1.7	98.8	26.4886	0.5283	2	100			3.23333	100.5
	QCII	78.2	79.0264	0.9304	1.2	101.1	76.7506	1.1403	1.5	98.1	78.4206	1.0561	1.3	100.3			1.33333	99.8333
	QCIII	281	278.842	23.153	8.3	99.2	268.864	6.9237	2.6	95.7	272.739	1.7781	0.7	97.1			3.86667	97.3333
			I				II				III
Compound	Standard	Actual Concentration	Mean	Standard Deviation	CV (%)	ACC (%)	Mean	Standard Deviation	CV (%)	ACC (%)	Mean	Standard Deviation	CV (%)	ACC (%)			CV (%)	ACC (%)
6-MAM	QCI	5.47	6.0459	0.4425	7.3	110.5	4.8198	0.239	5	88.1	5.5631	0.7209	13	101.7			8.43333	100.1
	QCII	16.8	17.8012	0.2803	1.6	106	17.3172	1.6354	9.4	103.1	15.9642	0.9838	6.2	95			5.73333	101.367
	QCIII	64.1	63.7129	5.6788	8.9	99.4	62.3493	0.9119	1.5	97.3	60.3167	3.1538	5.2	94.1			5.2	96.9333
			I				II				III
Compound	Standard	Actual Concentration	Mean	Standard Deviation	CV (%)	ACC (%)	Mean	Standard Deviation	CV (%)	ACC (%)	Mean	Standard Deviation	CV (%)	ACC (%)			CV (%)	ACC (%)
Methadone	QCI	56.4	57.5757	2.459	4.3	102.1	55.5338	1.2942	2.3	98.5	55.069	0.4451	0.8	97.6			2.46667	99.4
	QCII	165	164.581	2.8702	1.7	99.7	159.636	1.3729	0.9	96.7	161.848	2.1914	1.4	98.1			1.33333	98.1667
	QCIII	577	599.921	39.9977	6.7	104	569.932	17.185	3	98.8	558.565	7.7695	1.4	96.8			3.7	99.8667
			I				II				III
Compound	Standard	Actual Concentration	Mean	Standard Deviation	CV (%)	ACC (%)	Mean	Standard Deviation	CV (%)	ACC (%)	Mean	Standard Deviation	CV (%)	ACC (%)			CV (%)	ACC (%)
EDDP	QCI	50.6	51.4902	2.9654	5.8	101.8	49.1334	0.7546	1.5	97.1	49.7011	0.1582	0.3	98.2			2.53333	99.0333
	QCII	147	147.763	0.8178	0.6	100.5	143.765	1.8542	1.3	97.8	147.464	0.7775	0.5	100.3			0.8	99.5333
	QCIII	526	532.577	47.1292	8.8	101.3	502.695	10.4217	2.1	95.6	501.424	7.2978	1.5	95.3			4.13333	97.4
			I				II				III
Compound	Standard	Actual Concentration	Mean	Standard Deviation	CV (%)	ACC (%)	Mean	Standard Deviation	CV (%)	ACC (%)	Mean	Standard Deviation	CV (%)	ACC (%)			CV (%)	ACC (%)
Ketamine	QCI	53.1	55.948	4.5254	8.1	105.4	51.5299	2.7224	5.3	97	50.9945	2.7718	5.4	96			6.26667	99.4667
	QCII	160	168.927	5.2539	3.1	105.6	154.146	2.0409	1.3	96.3	151.999	4.5373	3	95			2.46667	98.9667
	QCIII	601	627.993	30.8885	4.9	104.5	630.766	21.6479	3.4	105	584.645	4.5997	0.8	97.3			3.03333	102.267

## Sheet: Carryover
Carry-over effect

[truncated: 2 more sheets: ME_RE_PE, Forensic cases]
